# Supplementary material for: Rapid and facile one-step synthesis of LiTaO3 nanorods
Source: Royal Society of Chemistry journal article supplement (doi:10.1039/c5ce00540j), 2015-01-01
Supplement: c5ce00540j1.pdf [file c5ce00540j1.pdf]

Supplementary Information for

## Rapid and Facile One-Step Synthesis of LiTaO<sub>3</sub> Nanorods

P.W. Jaschin and K.B.R. Varma\*

*Materials Research Centre, Indian Institute of Science, Bangalore-560012, India.*

*E-mail: kbrvarma@mrc.iisc.ernet.in; Fax: +91 80 2360 0683; Tel: +91 080 2293 2914*

**Histogram**

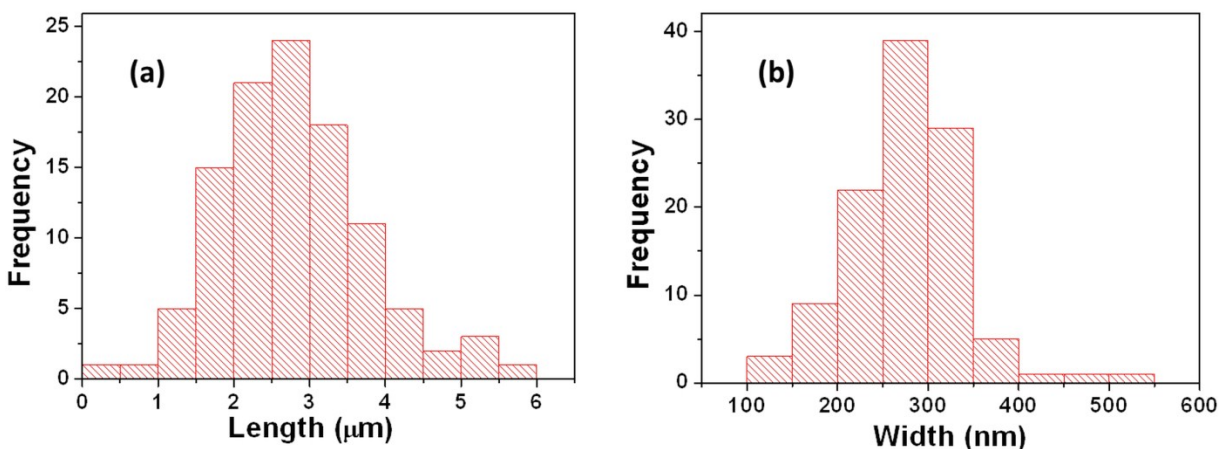

Fig. S1. A histogram showing the distribution in LiTaO<sub>3</sub> nanorod length and width.

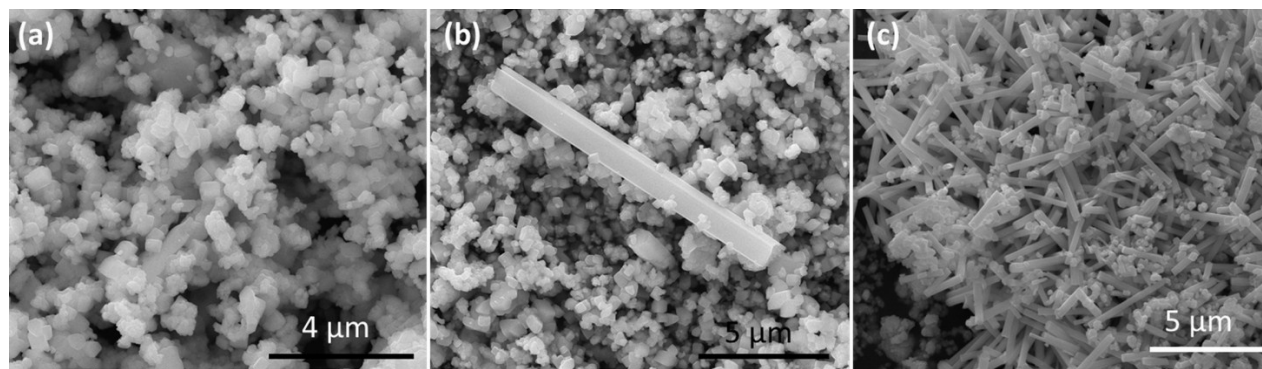

Fig. S2. Variation of crystalline morphology with (a) 3°C/min, (b) 40°C/min heating and cooling rate and (c) pre-heated furnace at 850°C and quenched to room temperature

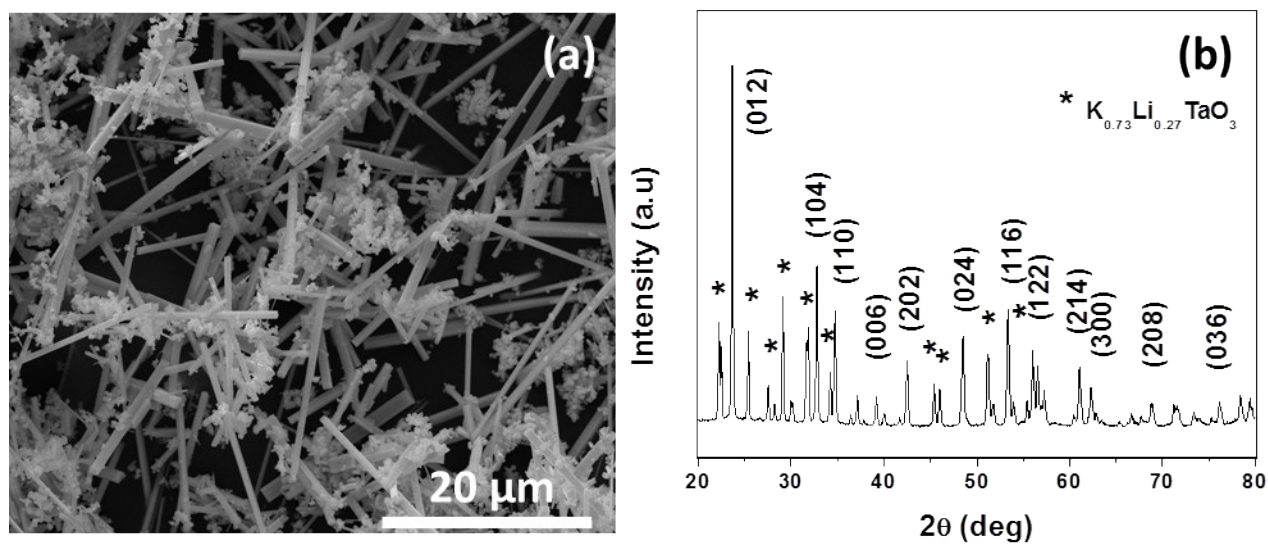

Fig. S3. (a) SEM image and (b) the corresponding XRD pattern of micro-rods formed after calcining under a higher molar ratio of KCl (1:1:35)
